# Supplementary material
Source: PubMed Central journal article supplement (PMC3374308)
Supplement: supp_112.139469_139469SI.pdf [file supp_112.139469_139469SI.pdf]

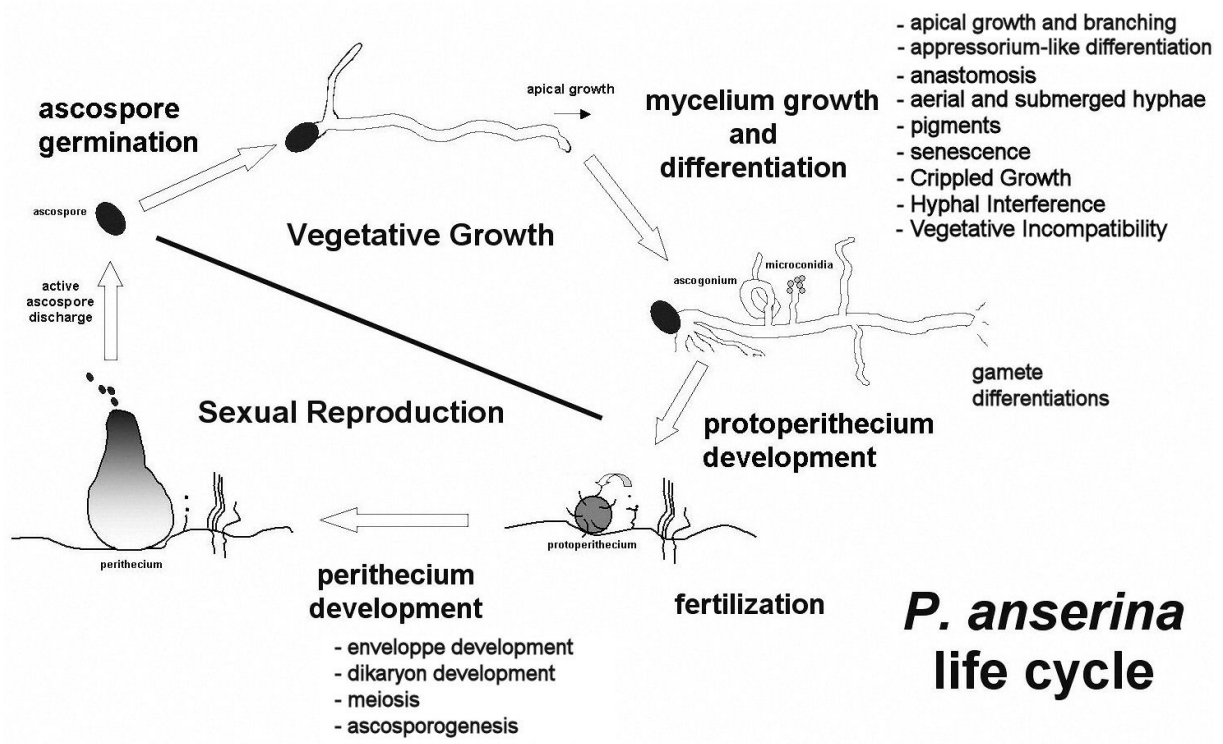

**Figure S1** Major developmental steps of the *P. anserina* life cycle and features that have been assessed in the MAPK mutants.

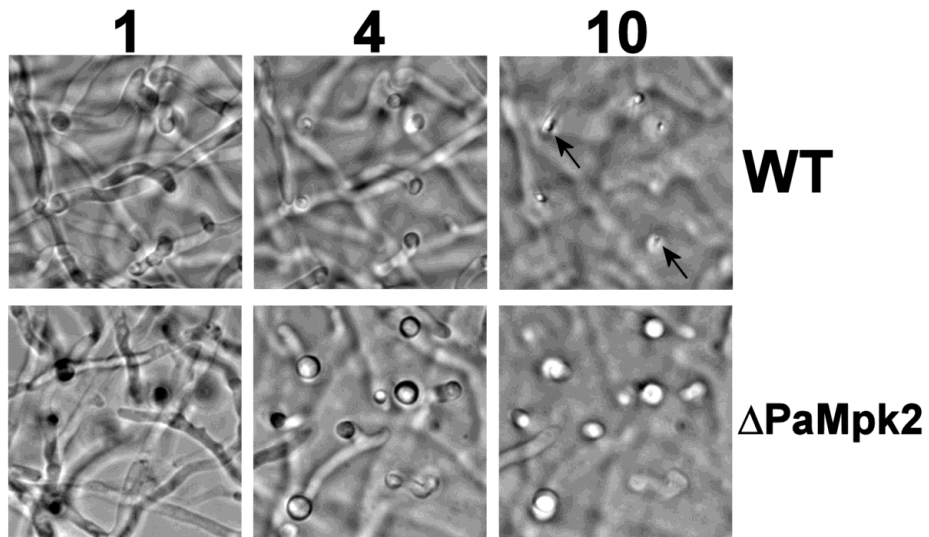

**Figure S2** Lack of appressorium-like structures in the  $\Delta PaMpk2$  mutants. Mycelia of the indicated strains were grown on cellophane overlaying M2 medium. Mycelium was observed after two days of growth at different focal planes. **1**, hyphae running parallel to the cellophane are observed. **4**, corresponds to a plan 4 mm below that of **1**; hyphae had reoriented in both wild type and the  $\Delta PaMpk2$  mutants and made bulging contacts with cellophane. **10**, i.e., 10  $\mu\text{m}$  below plan 1, needle like hyphae (arrows) have breached cellophane in wild type but not in mutants.

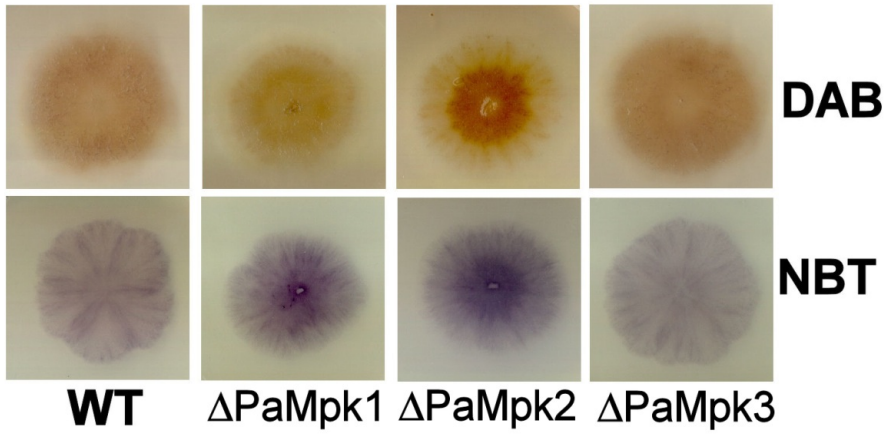

**Figure S3** DAB and NBT staining. Assays were performed on three-day old mycelia.

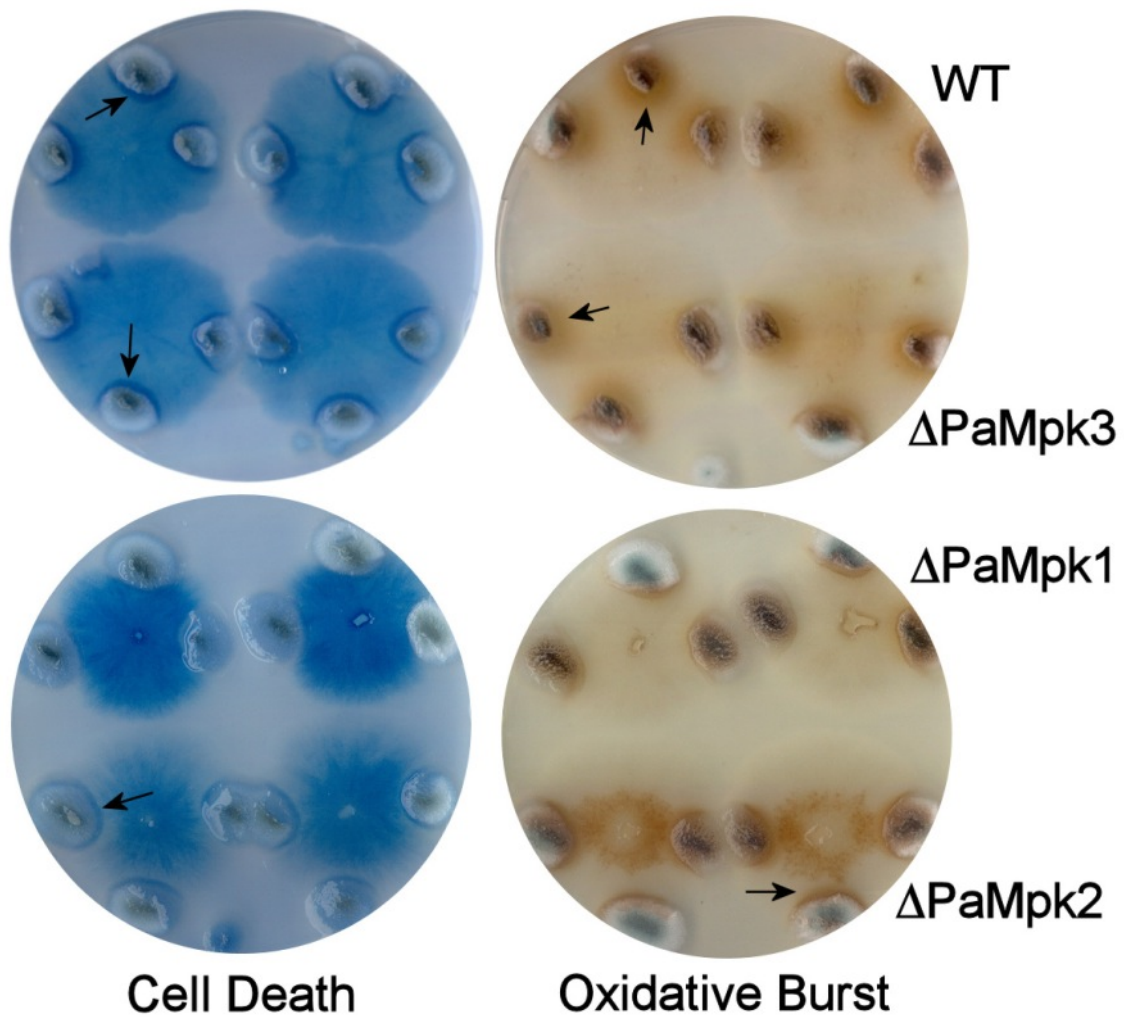

**Figure S4** Hyphal Interference in the MAPK mutants. Cell death and Oxidative Burst were revealed by the accumulation of Trypan blue and precipitation of DAB, respectively, at the confrontation between *P. anserina* and *Penicillium chrysogenum*. For each strain, two mycelia of *P. anserina* were inoculated with three neighbouring *P. chrysogenum* thalli. After three days of growth, the mycelia of the two competing species confront for at least 24 hours at which time the assays begin. Dead cells and oxidative burst (arrows) are clearly visible on wild type (WT) and the  $\Delta PaMpk3$  mutants, while they are reduced on the  $\Delta PaMpk2$  mutants and completely abolished in the  $\Delta PaMpk1$  ones. Note that as previously described (4) the  $\Delta PaMpk1$  mutant exhibit numerous dead cell all over the thallus.

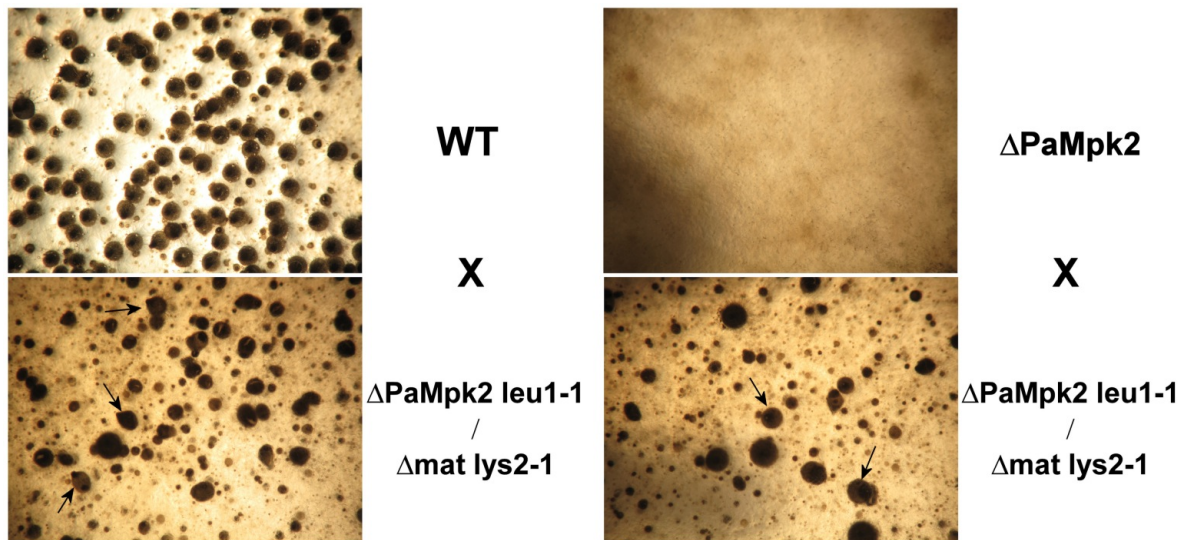

**Figure S5** Fertility rescue in heterokaryons.  $\Delta PaMpk2 leu1-1/\Delta mat lys2-1$  heterokaryons were crossed with wild type (WT) or  $\Delta PaMpk2$  mutants. When wild type was the female parent (top left), numerous normal perithecia matured. When  $\Delta PaMpk2$  mutants were the female parent, no perithecium was differentiated (Top right). When the heterokaryons were the female parent (bottom), a few normal-looking ascospore-producing perithecia (arrows) were obtained among numerous abnormal looking ones in both types of cross.

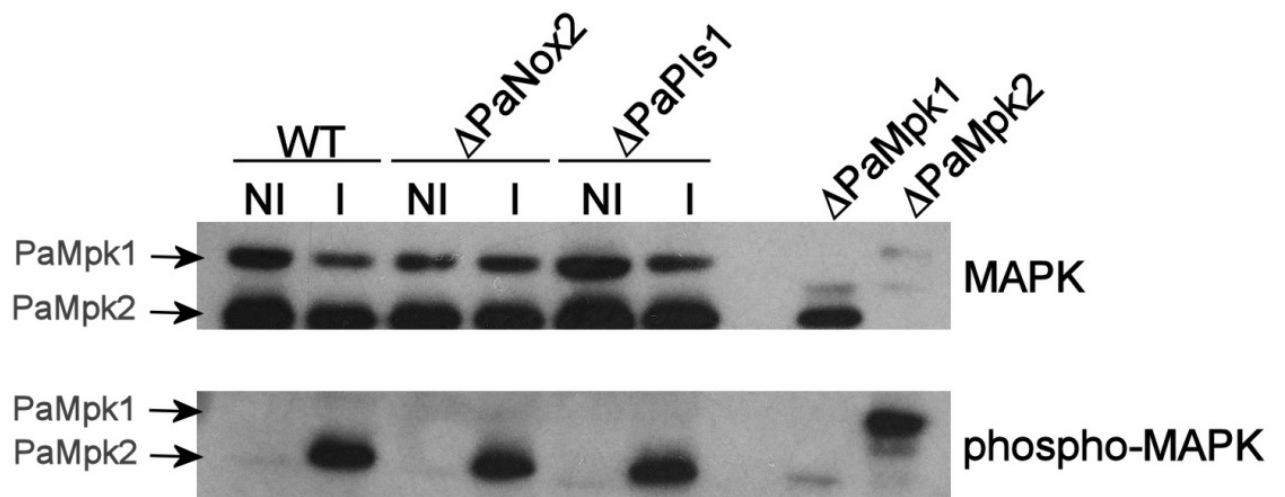

**Figure S6** Phosphorylation of PaMpk1 and PaMpk2 in ascospores. Ascospores non-induced (NI) and induced (I) for germination were assessed for the phosphorylation of PaMpk1 and PaMpk2. Ascospores were obtained from homozygous wild-type,  $\Delta PaNox2$  and  $\Delta PaPls1$  crosses. Protein extract from  $\Delta PaMpk1$  and  $\Delta PaMpk2$  mycelia were loaded as control.

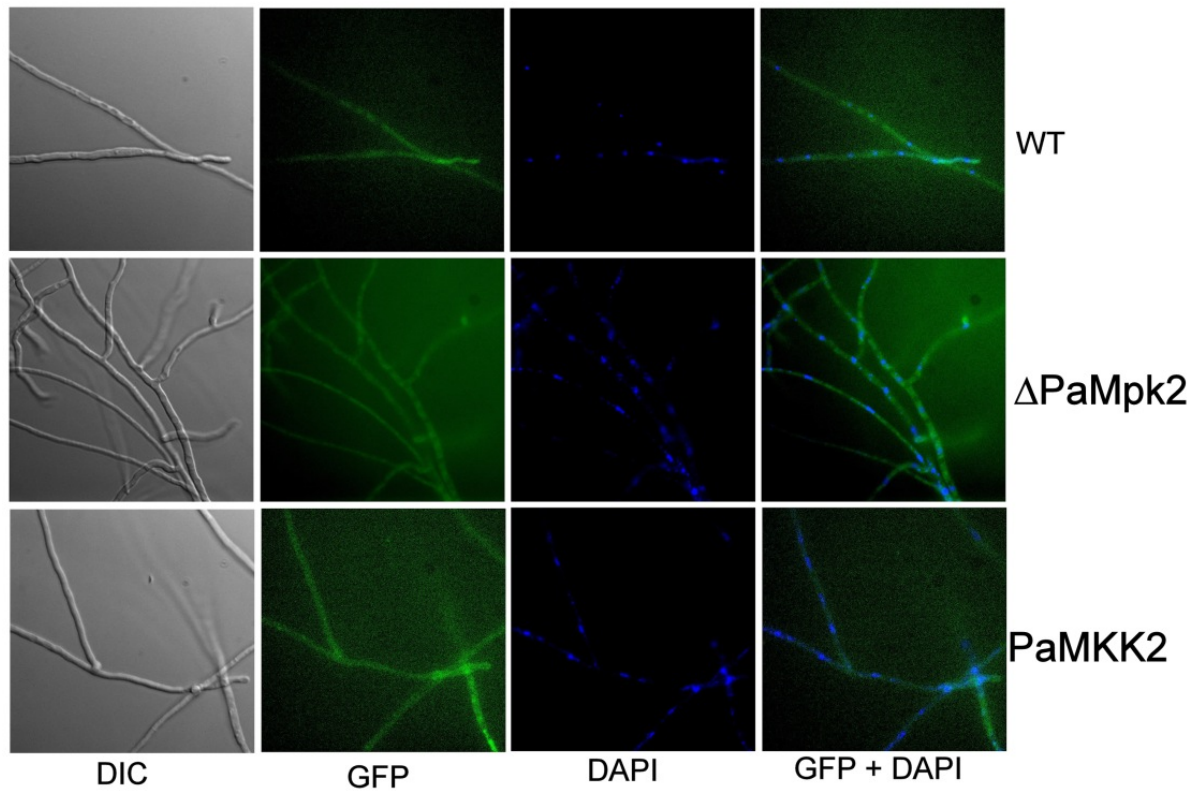

**Figure S7** Localization of PaMpk1 in apical hyphae. Hyphae from the growing edge of cultures of the indicated strains carrying the PaMpk1-GFP transgene presents only diffuse fluorescence.

**Table S1** The full set of MAP kinases in *P. anserina*

|        | <b>Mpk1-like</b> | <b>Fus3/Kss1-like</b> | <b>Hog1-like</b> |
|--------|------------------|-----------------------|------------------|
|        | <b>PaASK1</b>    | <b>PaTLK2</b>         | <b>PaHOK3</b>    |
| MAPKKK | (Pa_5_9370)      | (Pa_7_8030)           | (Pa_1_12080)     |
|        | 1832 aa          | 926 aa                | 1360 aa          |
|        | 0 EST            | 3 EST                 | 6 EST            |
|        | <b>PaMKK1</b>    | <b>PaMKK2</b>         | <b>PaMKK3</b>    |
| MAPKK  | (Pa_7_10270)     | (Pa_2_820)            | (Pa_1_15320)     |
|        | 527 aa           | 416 aa                | 681 aa           |
|        | 1 EST            | 1 EST                 | 10 EST           |
|        | <b>PaMpk1</b>    | <b>PaMpk2</b>         | <b>PaMpk3</b>    |
| MAPK   | (Pa_2_13340)     | (Pa_5_5680)           | (Pa_1_23930)     |
|        | 413 aa           | 353 aa                | 357 aa           |
|        | 17 EST           | 9 EST                 | 9 EST            |

The table gives the coding sequences (CDS) identifier as defined by the *P. anserina* genome project (<http://podospora.igmors.u-psud.fr>), the size of the proteins and the number of Expressed Sequence Tag (EST) found in the collection.



**Table S2 Primers**

---

|                 |                                                            |
|-----------------|------------------------------------------------------------|
| fus3gauche      | TTATTTTGGCGCTCGTTG                                         |
| fus3G-sphI      | ATGCATGCGTTGGATTAGGGAGAGTGGATT                             |
| fus3D-notI      | ATGCGGCCGCCCCGTTTGTGGAAAGTGGCTTG                           |
| fus3droit       | GCTGTCGAGGCTTTCACTAA                                       |
| MKK2A           | GGCCCGCAAGGTTAGTCT                                         |
| MKK2B           | CGGTGCATGATGTGGTGT                                         |
| TLK2-1F         | AACGGTGACACAGCATCGTTAGTAGAGAGG                             |
| Mk_TLK2-2R      | ctatttaacgacctgcacctgaaccgGGCGGAGCCTTGGTTTTCTCTTTG         |
| TLK2_Mk-2F      | CAAAGAGAAAACCAAGGCTCCGCCcgggtcagggcagggcgtaaatag           |
| TLK2_Mk-3R      | CAAGCACGGCTCTCCCAAGAATCAATTATcatcgaactggatctcaacagcggaag   |
| Mk_TLK2-3F      | cttaccgctgttgagatccagttcgtatgATAATTGATTCTTGGGAGAGCCGTGCTTG |
| TLK2-4R         | GTTCTAGCGCAAACGCAAGTCAATTTATCC                             |
| MKK2_GF_CH1_for | GTGAGTCTCATCAACGACATCGCTGACGACTTTGTCCGGTACGTC              |
| MKK2_GF_CH1_rev | GACGTACCGACAAAGTCGTCAGCGATGTCGTTGATGAGCTCAC                |
| Mpk2_for        | CGGCGACGTAACCTCGACCT                                       |
| Mpk2_rev        | GCAGGCGAGCATGGTTAT                                         |
| HOG1AML         | GTCGACATGTGTGGTTCGGGCAGT                                   |
| HOG1AMR         | GGGCCCTGTGGCGGGGAAGATAGA                                   |
| HOG1VML         | GCGGCCGCCCCGATATGGGTGGTCCTG                                |
| HOG1VMR         | GTCGACAAAGCTGTTGACGCTTTGC                                  |
| M3K2GF          | GATATCTCCATGGTTTTTGGAGCTG                                  |
| M3K2GR          | TCTAGATGTGTGGTTGAGGTTGCAC                                  |
| M3K2DF          | CTCGAGGTGCGAGCAACAACAGC                                    |
| M3K2DR          | GATATCTCGTGTGCAATCATCCTATCA                                |
| HOK3GF          | GATATCTCATTCTTTTCTGAAACAGC                                 |
| HOK3GR          | TCTAGATCGATCGTATGCCCACTG                                   |
| HOK3DF          | CTCGAGCGAAATGGATACCCCTTGG                                  |
| HOK3DR          | GATATCTCTCATTACCACCAACAACAA                                |

---

**Table S3 Stress resistance phenotypes associated with the PaMpk1, PaMpk2 and PaMpk3 MAPK modules inactivation**

|                                                              | WT   | $\Delta$ PaMpk<br>1 | PaMKK1<br>(IDC <sup>404</sup> ) | PaASK1<br>(IDC <sup>118</sup> ) | $\Delta$ PaMpk2 | $\Delta$ PaMKK<br>2 | $\Delta$ PaTLK2 | $\Delta$ PaMpk3 | $\Delta$ PaMKK<br>3 | $\Delta$ PaHOK<br>3 | $\Delta$ 1 $\Delta$ 2 | $\Delta$ 1 $\Delta$ 3 | $\Delta$ 2 $\Delta$ 3 | $\Delta$ 1 $\Delta$ 2 $\Delta$ 3 |
|--------------------------------------------------------------|------|---------------------|---------------------------------|---------------------------------|-----------------|---------------------|-----------------|-----------------|---------------------|---------------------|-----------------------|-----------------------|-----------------------|----------------------------------|
| thermo-sensitivity at 37°C <sup>a</sup>                      | 100% | 80%                 | 80%                             | 85%                             | 85%             | 85%                 | 80%             | 100%            | 100%                | 100%                | 100%                  | 80%                   | 70%                   | 100%                             |
| cryo-sensitivity at 11°C <sup>a</sup>                        | 100% | 90%                 | 90%                             | 90%                             | 80%             | 80%                 | 80%             | 100%            | 100%                | 100%                | 80%                   | 80%                   | 80%                   | 75%                              |
| neutral osmo-sensitivity<br>(sorbitol 200g/l) <sup>a</sup>   | 100% | 95%                 | 95%                             | 95%                             | 95%             | 95%                 | 85%             | 0%              | 0%                  | 0%                  | 10%                   | 0%                    | 0%                    | 0%                               |
| neutral osmo-sensitivity<br>(saccharose 200g/l) <sup>a</sup> | 100% | 95%                 | 95%                             | 95%                             | 75%             | 75%                 | 90%             | 50%             | 50%                 | 50%                 | 95%                   | 30%                   | 0%                    | 0%                               |
| ionic sensitivity<br>(KCl 0.5M) <sup>a</sup>                 | 100% | 80%                 | 80%                             | 80%                             | 90%             | 90%                 | 75%             | 0%              | 0%                  | 0%                  | 35%                   | 0%                    | 0%                    | 0%                               |
| ionic sensitivity<br>(NaCl 0.5M) <sup>a</sup>                | 100% | 80%                 | 80%                             | 80%                             | 95%             | 95%                 | 75%             | 0%              | 0%                  | 0%                  | 70%                   | 0%                    | 0%                    | 0%                               |
| ionic sensitivity<br>(CaCl <sub>2</sub> 0.5M) <sup>a</sup>   | 100% | 85%                 | 85%                             | 85%                             | 30%             | 30%                 | 85%             | 0%              | 0%                  | 0%                  | 30%                   | 0%                    | 0%                    | 0%                               |
| 0.5 mM EGTA <sup>a</sup>                                     | 100% | 90%                 | 90%                             | 90%                             | 80%             | 80%                 | 90%             | 95%             | 95%                 | 95%                 | 110%                  | 90%                   | 75%                   | 80%                              |
| 0.04% H <sub>2</sub> O <sub>2</sub> sensitivity <sup>a</sup> | 100% | 140%                | 160%                            | 160%                            | 180%            | 180%                | 180%            | 160%            | 160%                | 170%                | 170%                  | 160%                  | 175%                  | 0%                               |
| 10-4 M TBY sensitivity <sup>a</sup>                          | 100% | 105%                | 105%                            | 100%                            | 110%            | 105%                | 75%             | 100%            | 100%                | 105%                | 140%                  | 95%                   | 120%                  | 115%                             |
| 5. 10-5 M Menadione<br>sensitivity <sup>a</sup>              | 100% | 80%                 | 85%                             | 95%                             | 115%            | 100%                | 95%             | 115%            | 110%                | 120%                | 125%                  | 0%                    | 105%                  | 110%                             |
| 50 $\mu$ g/ml calcofluor sensitivity <sup>a</sup>            | 100% | 90%                 | 90%                             | 100%                            | 185%            | 175%                | 175%            | 120%            | 100%                | 120%                | 135%                  | 85%                   | 160%                  | 140%                             |
| 5mM caffeine sensitivity <sup>a</sup>                        | 100% | 110%                | 110%                            | 115%                            | 115%            | 115%                | 115%            | 100%            | 100%                | 100%                | 115%                  | 115%                  | 115%                  | 130%                             |

|                                     |      |      |      |      |      |      |      |      |      |      |      |      |      |      |
|-------------------------------------|------|------|------|------|------|------|------|------|------|------|------|------|------|------|
| 0,1 µg/ml nikkomycin<br>sensitivity | 100% | 75%  | 75%  | 75%  | 130% | 130% | 115% | 100% | 100% | 100% | 130% | 75%  | 130% | 100% |
| 5 µg/ml Iprodione <sup>a</sup>      | 100% | 105% | 105% | 105% | 180% | 160% | 105% | 100% | 100% | 100% | 160% | 100% | 170% | 190% |
| 0.01 µg/ml Fluoxonil <sup>a</sup>   | 100% | 40%  | 70%  | 105% | 220% | 135% | 50%  | 185% | 195% | 200% | 165% | 180% | 220% | 225% |

---

<sup>a</sup> the table gives the percentage of growth speed as compared to wild type (100%)

**Table S4 Efficiency of cellulose degradation as compared to wild type**

|                                       | <b>3d</b> | <b>5d</b> | <b>7d</b> |
|---------------------------------------|-----------|-----------|-----------|
| <b><i>ΔPaMpk1</i></b>                 | 73%       | 77%       | 93%       |
| <b><i>ΔPaMKK1</i></b>                 | 41%       | 69%       | 91%       |
| <b><i>ΔPaASK1</i></b>                 | 73%       | 76%       | 108%      |
| <b><i>ΔPaMpk2</i></b>                 | 36%       | 41%       | 52%       |
| <b><i>ΔPaMKK2</i></b>                 | 14%       | 39%       | 46%       |
| <b><i>ΔPaTLK2</i></b>                 | 42%       | 37%       | 46%       |
| <b><i>ΔPaMpk3</i></b>                 | 86%       | 96%       | 97%       |
| <b><i>ΔPaMKK3</i></b>                 | 100%      | 98%       | 102%      |
| <b><i>ΔPaHOK3</i></b>                 | 88%       | 99%       | 99%       |
| <b><i>ΔPaMpk1 ΔPaMpk2</i></b>         | 20%       | 47%       | 70%       |
| <b><i>ΔPaMpk1 ΔPaMpk3</i></b>         | 47%       | 76%       | 88%       |
| <b><i>ΔPaMpk2 ΔPaMpk3</i></b>         | 7%        | 40%       | 57%       |
| <b><i>ΔPaMpk1 ΔPaMpk2 ΔPaMpk3</i></b> | 16%       | 42%       | 69%       |

The table gives the loss of dry weight of Whatman paper pieces incubated for 3, 5 and 7 days of *P. anserina* mutants as compared to wild type.
