# Supplementary material
Source: PubMed Central journal article supplement (PMC3374308)
Supplement: supp_112.139469_FigureS1.pdf [file supp_112.139469_FigureS1.pdf]

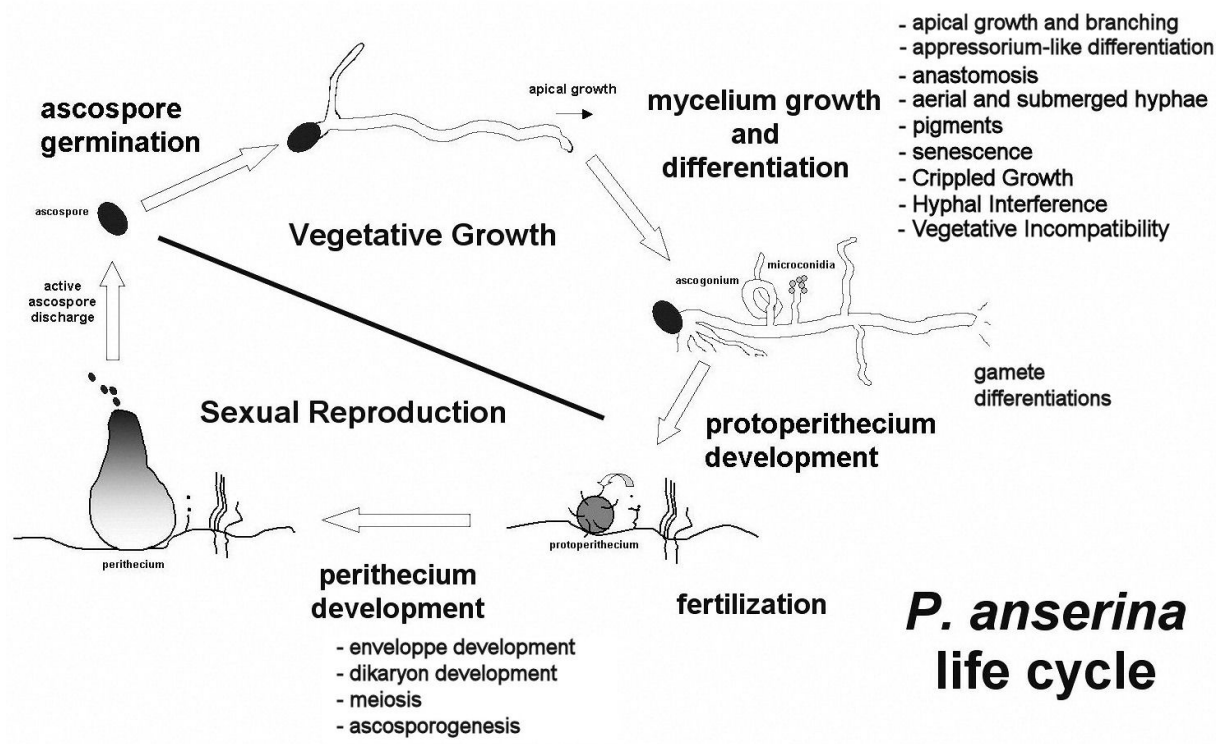

**Figure S1** Major developmental steps of the *P. anserina* life cycle and features that have been assessed in the MAPK mutants.
