# Supplementary material
Source: PubMed Central journal article supplement (PMC3374308)
Supplement: supp_112.139469_FigureS2.pdf [file supp_112.139469_FigureS2.pdf]

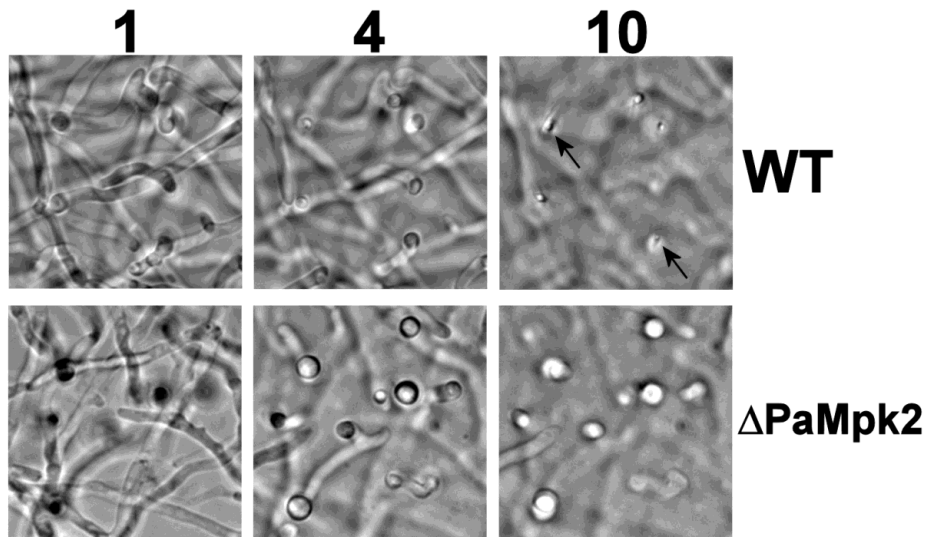

**Figure S2** Lack of appressorium-like structures in the  $\Delta PaMpk2$  mutants. Mycelia of the indicated strains were grown on cellophane overlaying M2 medium. Mycelium was observed after two days of growth at different focal planes. **1**, hyphae running parallel to the cellophane are observed. **4**, corresponds to a plan 4 mm below that of **1**; hyphae had reoriented in both wild type and the  $\Delta PaMpk2$  mutants and made bulging contacts with cellophane. **10**, i.e., 10  $\mu\text{m}$  below plan 1, needle like hyphae (arrows) have breached cellophane in wild type but not in mutants.
