# Supplementary material
Source: PubMed Central journal article supplement (PMC3374308)
Supplement: supp_112.139469_FigureS4.pdf [file supp_112.139469_FigureS4.pdf]

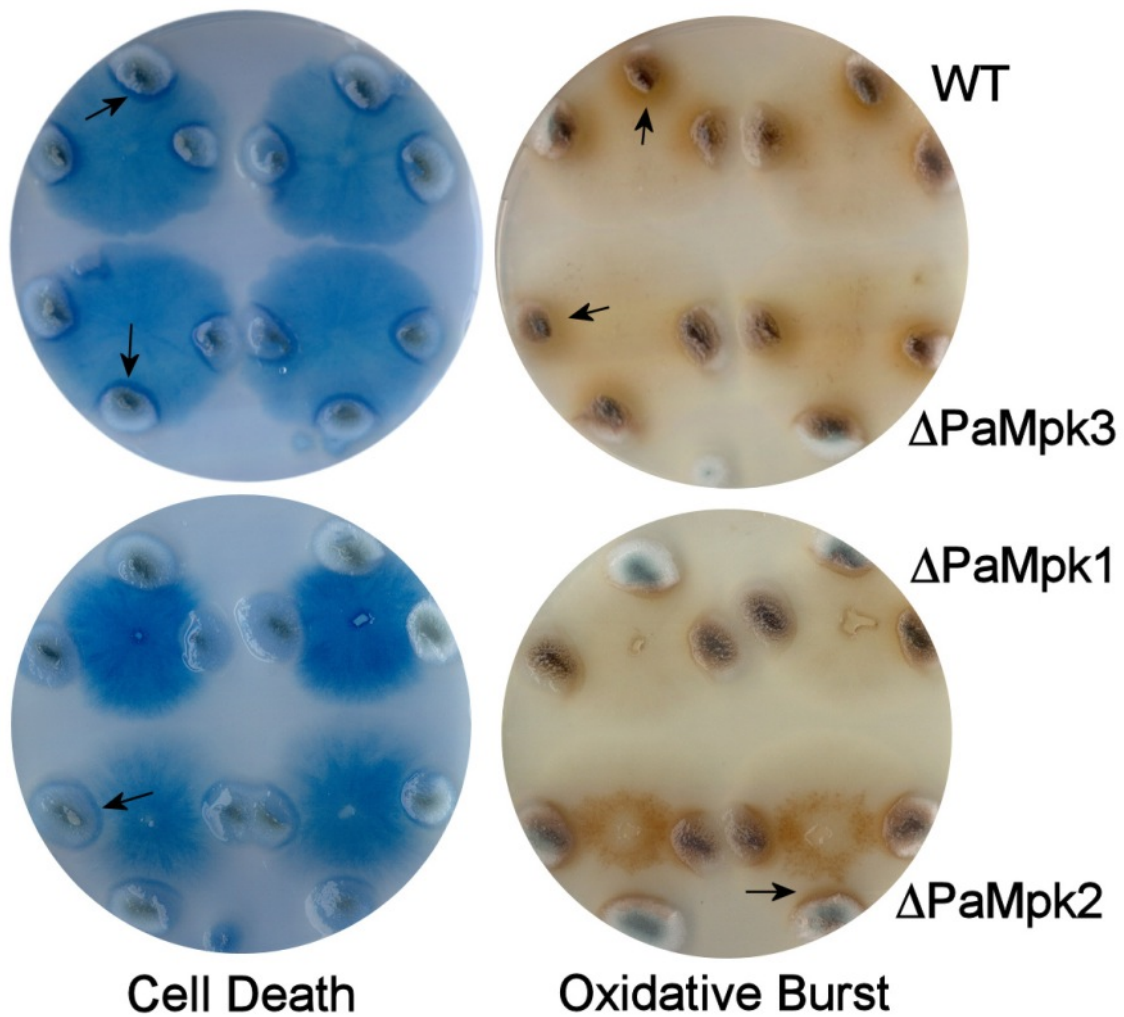

**Figure S4** Hyphal Interference in the MAPK mutants. Cell death and Oxidative Burst were revealed by the accumulation of Trypan blue and precipitation of DAB, respectively, at the confrontation between *P. anserina* and *Penicillium chrysogenum*. For each strain, two mycelia of *P. anserina* were inoculated with three neighbouring *P. chrysogenum* thalli. After three days of growth, the mycelia of the two competing species confront for at least 24 hours at which time the assays begin. Dead cells and oxidative burst (arrows) are clearly visible on wild type (WT) and the  $\Delta PaMpk3$  mutants, while they are reduced on the  $\Delta PaMpk2$  mutants and completely abolished in the  $\Delta PaMpk1$  ones. Note that as previously described (4) the  $\Delta PaMpk1$  mutant exhibit numerous dead cell all over the thallus.
