# Supplementary material
Source: PubMed Central journal article supplement (PMC3374308)
Supplement: supp_112.139469_FigureS5.pdf [file supp_112.139469_FigureS5.pdf]

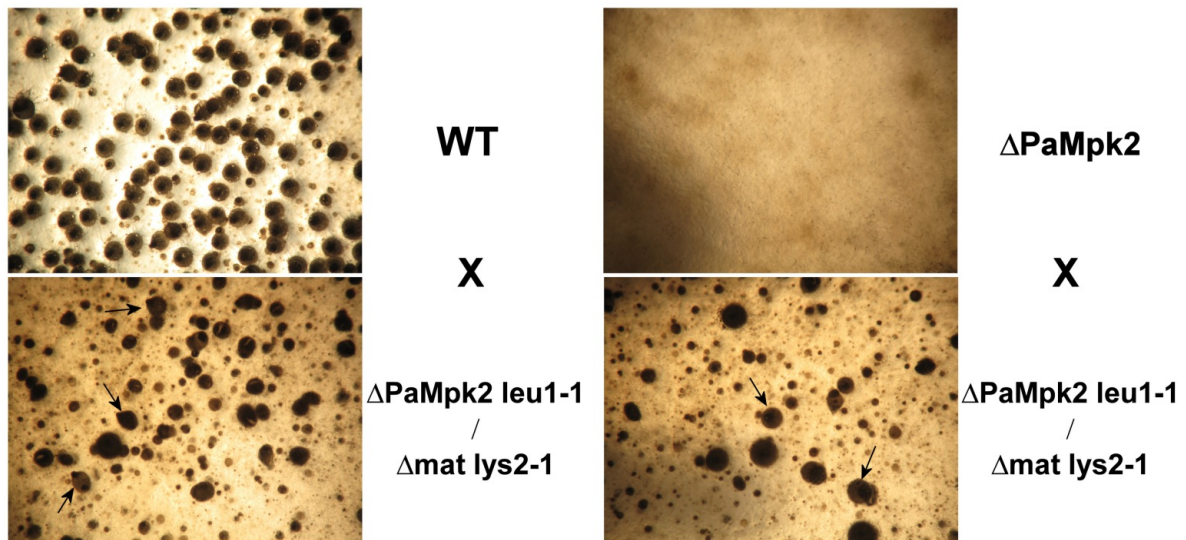

**Figure S5** Fertility rescue in heterokaryons.  $\Delta PaMpk2 leu1-1/\Delta mat lys2-1$  heterokaryons were crossed with wild type (WT) or  $\Delta PaMpk2$  mutants. When wild type was the female parent (top left), numerous normal perithecia matured. When  $\Delta PaMpk2$  mutants were the female parent, no perithecium was differentiated (Top right). When the heterokaryons were the female parent (bottom), a few normal-looking ascospore-producing perithecia (arrows) were obtained among numerous abnormal looking ones in both types of cross.
