# Supplementary material
Source: PubMed Central journal article supplement (PMC3374308)
Supplement: supp_112.139469_FigureS6.pdf [file supp_112.139469_FigureS6.pdf]

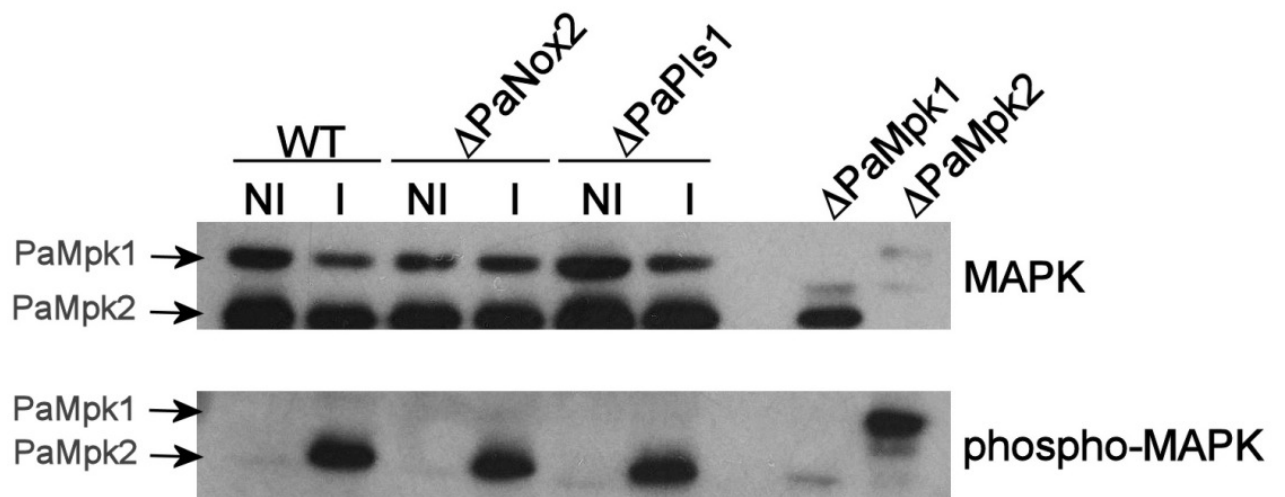

**Figure S6** Phosphorylation of PaMpk1 and PaMpk2 in ascospores. Ascospores non-induced (NI) and induced (I) for germination were assessed for the phosphorylation of PaMpk1 and PaMpk2. Ascospores were obtained from homozygous wild-type,  $\Delta PaNox2$  and  $\Delta PaPls1$  crosses. Protein extract from  $\Delta PaMpk1$  and  $\Delta PaMpk2$  mycelia were loaded as control.
