# Supplementary material
Source: PubMed Central journal article supplement (PMC3374308)
Supplement: supp_112.139469_FigureS7.pdf [file supp_112.139469_FigureS7.pdf]

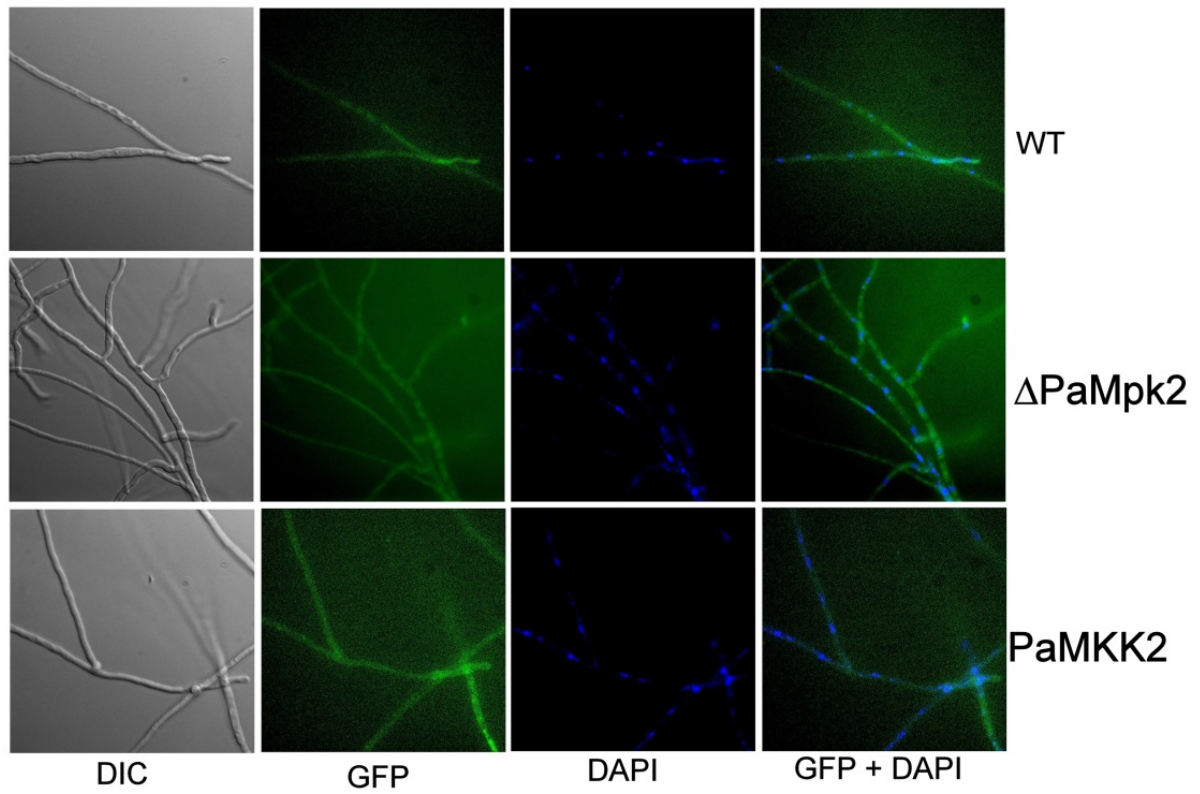

**Figure S7** Localization of PaMpk1 in apical hyphae. Hyphae from the growing edge of cultures of the indicated strains carrying the PaMpk1-GFP transgene presents only diffuse fluorescence.
