# Supplementary material
Source: PubMed Central journal article supplement (PMC3374308)
Supplement: supp_112.139469_TableS1.pdf [file supp_112.139469_TableS1.pdf]

**Table S1** The full set of MAP kinases in *P. anserina*

|        | <b>Mpk1-like</b> | <b>Fus3/Kss1-like</b> | <b>Hog1-like</b> |
|--------|------------------|-----------------------|------------------|
|        | <b>PaASK1</b>    | <b>PaTLK2</b>         | <b>PaHOK3</b>    |
| MAPKKK | (Pa_5_9370)      | (Pa_7_8030)           | (Pa_1_12080)     |
|        | 1832 aa          | 926 aa                | 1360 aa          |
|        | 0 EST            | 3 EST                 | 6 EST            |
|        | <b>PaMKK1</b>    | <b>PaMKK2</b>         | <b>PaMKK3</b>    |
| MAPKK  | (Pa_7_10270)     | (Pa_2_820)            | (Pa_1_15320)     |
|        | 527 aa           | 416 aa                | 681 aa           |
|        | 1 EST            | 1 EST                 | 10 EST           |
|        | <b>PaMpk1</b>    | <b>PaMpk2</b>         | <b>PaMpk3</b>    |
| MAPK   | (Pa_2_13340)     | (Pa_5_5680)           | (Pa_1_23930)     |
|        | 413 aa           | 353 aa                | 357 aa           |
|        | 17 EST           | 9 EST                 | 9 EST            |

The table gives the coding sequences (CDS) identifier as defined by the *P. anserina* genome project (<http://podospora.igmors.u-psud.fr>), the size of the proteins and the number of Expressed Sequence Tag (EST) found in the collection.
