# Supplementary material
Source: PubMed Central journal article supplement (PMC3374308)
Supplement: supp_112.139469_TableS2.pdf [file supp_112.139469_TableS2.pdf]

**Table S2 Primers**

---

|                 |                                                            |
|-----------------|------------------------------------------------------------|
| fus3gauche      | TTATTTTGGCGCTCGTTG                                         |
| fus3G-sphI      | ATGCATGCGTTGGATTAGGGAGAGTGGATT                             |
| fus3D-notI      | ATGCGGCCGCCCCGTTTGTGGAAAGTGGCTTG                           |
| fus3droit       | GCTGTCGAGGCTTTCACTAA                                       |
| MKK2A           | GGCCCGCAAGGTTAGTCT                                         |
| MKK2B           | CGGTGCATGATGTGGTGT                                         |
| TLK2-1F         | AACGGTGACACAGCATCGTTAGTAGAGAGG                             |
| Mk_TLK2-2R      | ctatttaacgacctgcacctgaaccgGGCGGAGCCTTGGTTTTCTCTTTG         |
| TLK2_Mk-2F      | CAAAGAGAAAACCAAGGCTCCGCCcgggtcagggcagggcgtaaatag           |
| TLK2_Mk-3R      | CAAGCACGGCTCTCCCAAGAATCAATTATcatcgaactggatctcaacagcggaag   |
| Mk_TLK2-3F      | cttaccgctgttgagatccagttcgtatgATAATTGATTCTTGGGAGAGCCGTGCTTG |
| TLK2-4R         | GTTCTAGCGCAAACGCAAGTCAATTTATCC                             |
| MKK2_GF_CH1_for | GTGAGTCTCATCAACGACATCGCTGACGACTTTGTCCGGTACGTC              |
| MKK2_GF_CH1_rev | GACGTACCGACAAAGTCGTCAGCGATGTCGTTGATGAGCTCAC                |
| Mpk2_for        | CGGCGACGTAACCTCGACCT                                       |
| Mpk2_rev        | GCAGGCGAGCATGGTTAT                                         |
| HOG1AML         | GTCGACATGTGTGGTTCGGGCAGT                                   |
| HOG1AMR         | GGGCCCTGTGGCGGGGAAGATAGA                                   |
| HOG1VML         | GCGGCCGCCCCGATATGGGTGGTCCTG                                |
| HOG1VMR         | GTCGACAAAGCTGTTGACGCTTTGC                                  |
| M3K2GF          | GATATCTCCATGGTTTTTGGAGCTG                                  |
| M3K2GR          | TCTAGATGTGTGGTTGAGGTTGCAC                                  |
| M3K2DF          | CTCGAGGTGCGAGCAACAACAGC                                    |
| M3K2DR          | GATATCTCGTGTGCAATCATCCTATCA                                |
| HOK3GF          | GATATCTCATTCTTTTCTGAAACAGC                                 |
| HOK3GR          | TCTAGATCGATCGTATGCCCACTG                                   |
| HOK3DF          | CTCGAGCGAAATGGATACCCCTTGG                                  |
| HOK3DR          | GATATCTCTCATTACCACCAACAACAA                                |

---
