# Supplementary material
Source: PubMed Central journal article supplement (PMC3374308)
Supplement: supp_112.139469_TableS3.pdf [file supp_112.139469_TableS3.pdf]

**Table S3 Stress resistance phenotypes associated with the PaMpk1, PaMpk2 and PaMpk3 MAPK modules inactivation**

|                                                              | WT   | $\Delta$ PaMpk<br>1 | PaMKK1<br>(IDC <sup>404</sup> ) | PaASK1<br>(IDC <sup>118</sup> ) | $\Delta$ PaMpk2 | $\Delta$ PaMKK<br>2 | $\Delta$ PaTLK2 | $\Delta$ PaMpk3 | $\Delta$ PaMKK<br>3 | $\Delta$ PaHOK<br>3 | $\Delta$ 1 $\Delta$ 2 | $\Delta$ 1 $\Delta$ 3 | $\Delta$ 2 $\Delta$ 3 | $\Delta$ 1 $\Delta$ 2 $\Delta$ 3 |
|--------------------------------------------------------------|------|---------------------|---------------------------------|---------------------------------|-----------------|---------------------|-----------------|-----------------|---------------------|---------------------|-----------------------|-----------------------|-----------------------|----------------------------------|
| thermo-sensitivity at 37°C <sup>a</sup>                      | 100% | 80%                 | 80%                             | 85%                             | 85%             | 85%                 | 80%             | 100%            | 100%                | 100%                | 100%                  | 80%                   | 70%                   | 100%                             |
| cryo-sensitivity at 11°C <sup>a</sup>                        | 100% | 90%                 | 90%                             | 90%                             | 80%             | 80%                 | 80%             | 100%            | 100%                | 100%                | 80%                   | 80%                   | 80%                   | 75%                              |
| neutral osmo-sensitivity<br>(sorbitol 200g/l) <sup>a</sup>   | 100% | 95%                 | 95%                             | 95%                             | 95%             | 95%                 | 85%             | 0%              | 0%                  | 0%                  | 10%                   | 0%                    | 0%                    | 0%                               |
| neutral osmo-sensitivity<br>(saccharose 200g/l) <sup>a</sup> | 100% | 95%                 | 95%                             | 95%                             | 75%             | 75%                 | 90%             | 50%             | 50%                 | 50%                 | 95%                   | 30%                   | 0%                    | 0%                               |
| ionic sensitivity<br>(KCl 0.5M) <sup>a</sup>                 | 100% | 80%                 | 80%                             | 80%                             | 90%             | 90%                 | 75%             | 0%              | 0%                  | 0%                  | 35%                   | 0%                    | 0%                    | 0%                               |
| ionic sensitivity<br>(NaCl 0.5M) <sup>a</sup>                | 100% | 80%                 | 80%                             | 80%                             | 95%             | 95%                 | 75%             | 0%              | 0%                  | 0%                  | 70%                   | 0%                    | 0%                    | 0%                               |
| ionic sensitivity<br>(CaCl <sub>2</sub> 0.5M) <sup>a</sup>   | 100% | 85%                 | 85%                             | 85%                             | 30%             | 30%                 | 85%             | 0%              | 0%                  | 0%                  | 30%                   | 0%                    | 0%                    | 0%                               |
| 0.5 mM EGTA <sup>a</sup>                                     | 100% | 90%                 | 90%                             | 90%                             | 80%             | 80%                 | 90%             | 95%             | 95%                 | 95%                 | 110%                  | 90%                   | 75%                   | 80%                              |
| 0.04% H <sub>2</sub> O <sub>2</sub> sensitivity <sup>a</sup> | 100% | 140%                | 160%                            | 160%                            | 180%            | 180%                | 180%            | 160%            | 160%                | 170%                | 170%                  | 160%                  | 175%                  | 0%                               |
| 10-4 M TBX sensitivity <sup>a</sup>                          | 100% | 105%                | 105%                            | 100%                            | 110%            | 105%                | 75%             | 100%            | 100%                | 105%                | 140%                  | 95%                   | 120%                  | 115%                             |
| 5. 10-5 M Menadione<br>sensitivity <sup>a</sup>              | 100% | 80%                 | 85%                             | 95%                             | 115%            | 100%                | 95%             | 115%            | 110%                | 120%                | 125%                  | 0%                    | 105%                  | 110%                             |
| 50 $\mu$ g/ml calcofluor sensitivity <sup>a</sup>            | 100% | 90%                 | 90%                             | 100%                            | 185%            | 175%                | 175%            | 120%            | 100%                | 120%                | 135%                  | 85%                   | 160%                  | 140%                             |
| 5mM caffeine sensitivity <sup>a</sup>                        | 100% | 110%                | 110%                            | 115%                            | 115%            | 115%                | 115%            | 100%            | 100%                | 100%                | 115%                  | 115%                  | 115%                  | 130%                             |

|                                     |      |      |      |      |      |      |      |      |      |      |      |      |      |      |
|-------------------------------------|------|------|------|------|------|------|------|------|------|------|------|------|------|------|
| 0,1 µg/ml nikkomycin<br>sensitivity | 100% | 75%  | 75%  | 75%  | 130% | 130% | 115% | 100% | 100% | 100% | 130% | 75%  | 130% | 100% |
| 5 µg/ml Iprodione <sup>a</sup>      | 100% | 105% | 105% | 105% | 180% | 160% | 105% | 100% | 100% | 100% | 160% | 100% | 170% | 190% |
| 0.01 µg/ml Fluoxonil <sup>a</sup>   | 100% | 40%  | 70%  | 105% | 220% | 135% | 50%  | 185% | 195% | 200% | 165% | 180% | 220% | 225% |

---

<sup>a</sup> the table gives the percentage of growth speed as compared to wild type (100%)
