# Supplementary material
Source: PubMed Central journal article supplement (PMC3374308)
Supplement: supp_112.139469_TableS4.pdf [file supp_112.139469_TableS4.pdf]

**Table S4 Efficiency of cellulose degradation as compared to wild type**

|                                       | <b>3d</b> | <b>5d</b> | <b>7d</b> |
|---------------------------------------|-----------|-----------|-----------|
| <b><i>ΔPaMpk1</i></b>                 | 73%       | 77%       | 93%       |
| <b><i>ΔPaMkk1</i></b>                 | 41%       | 69%       | 91%       |
| <b><i>ΔPaASK1</i></b>                 | 73%       | 76%       | 108%      |
| <b><i>ΔPaMpk2</i></b>                 | 36%       | 41%       | 52%       |
| <b><i>ΔPaMkk2</i></b>                 | 14%       | 39%       | 46%       |
| <b><i>ΔPaTLK2</i></b>                 | 42%       | 37%       | 46%       |
| <b><i>ΔPaMpk3</i></b>                 | 86%       | 96%       | 97%       |
| <b><i>ΔPaMkk3</i></b>                 | 100%      | 98%       | 102%      |
| <b><i>ΔPaHOK3</i></b>                 | 88%       | 99%       | 99%       |
| <b><i>ΔPaMpk1 ΔPaMpk2</i></b>         | 20%       | 47%       | 70%       |
| <b><i>ΔPaMpk1 ΔPaMpk3</i></b>         | 47%       | 76%       | 88%       |
| <b><i>ΔPaMpk2 ΔPaMpk3</i></b>         | 7%        | 40%       | 57%       |
| <b><i>ΔPaMpk1 ΔPaMpk2 ΔPaMpk3</i></b> | 16%       | 42%       | 69%       |

The table gives the loss of dry weight of Whatman paper pieces incubated for 3, 5 and 7 days of *P. anserina* mutants as compared to wild type.
