# Supplementary material
Source: PubMed Central journal article supplement (PMC3374308)

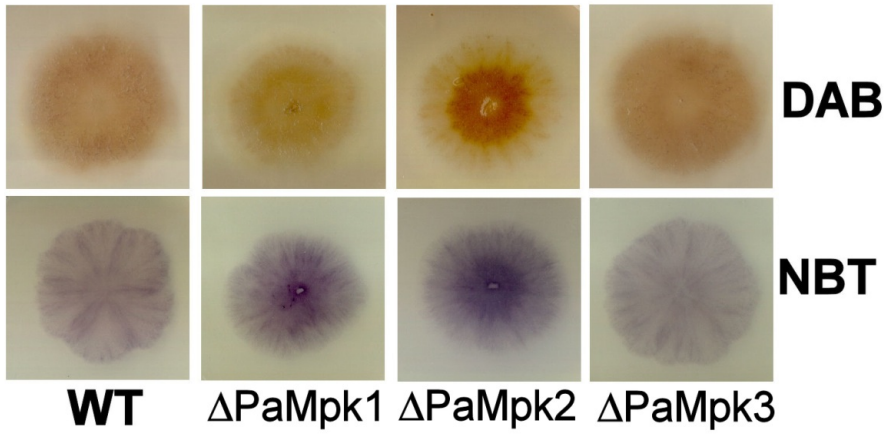

**Figure S3** DAB and NBT staining. Assays were performed on three-day old mycelia.

Supplement: supp_112.139469_FigureS3.pdf [file supp_112.139469_FigureS3.pdf]
